# Supplementary material for: Australian Institute of Sport and the Australian Paralympic Committee position statement: urinary tract infection in spinal cord injured athletes
Source: HighWire-hosted journal article supplement (doi:10.1136/bjsports-2014-094527), 2015-04-13

# Appendix A: Urinary Tract Infection Prevention and Management Flowchart for Use During Team Travel

## Urinary Tract Infection Prevention & Management

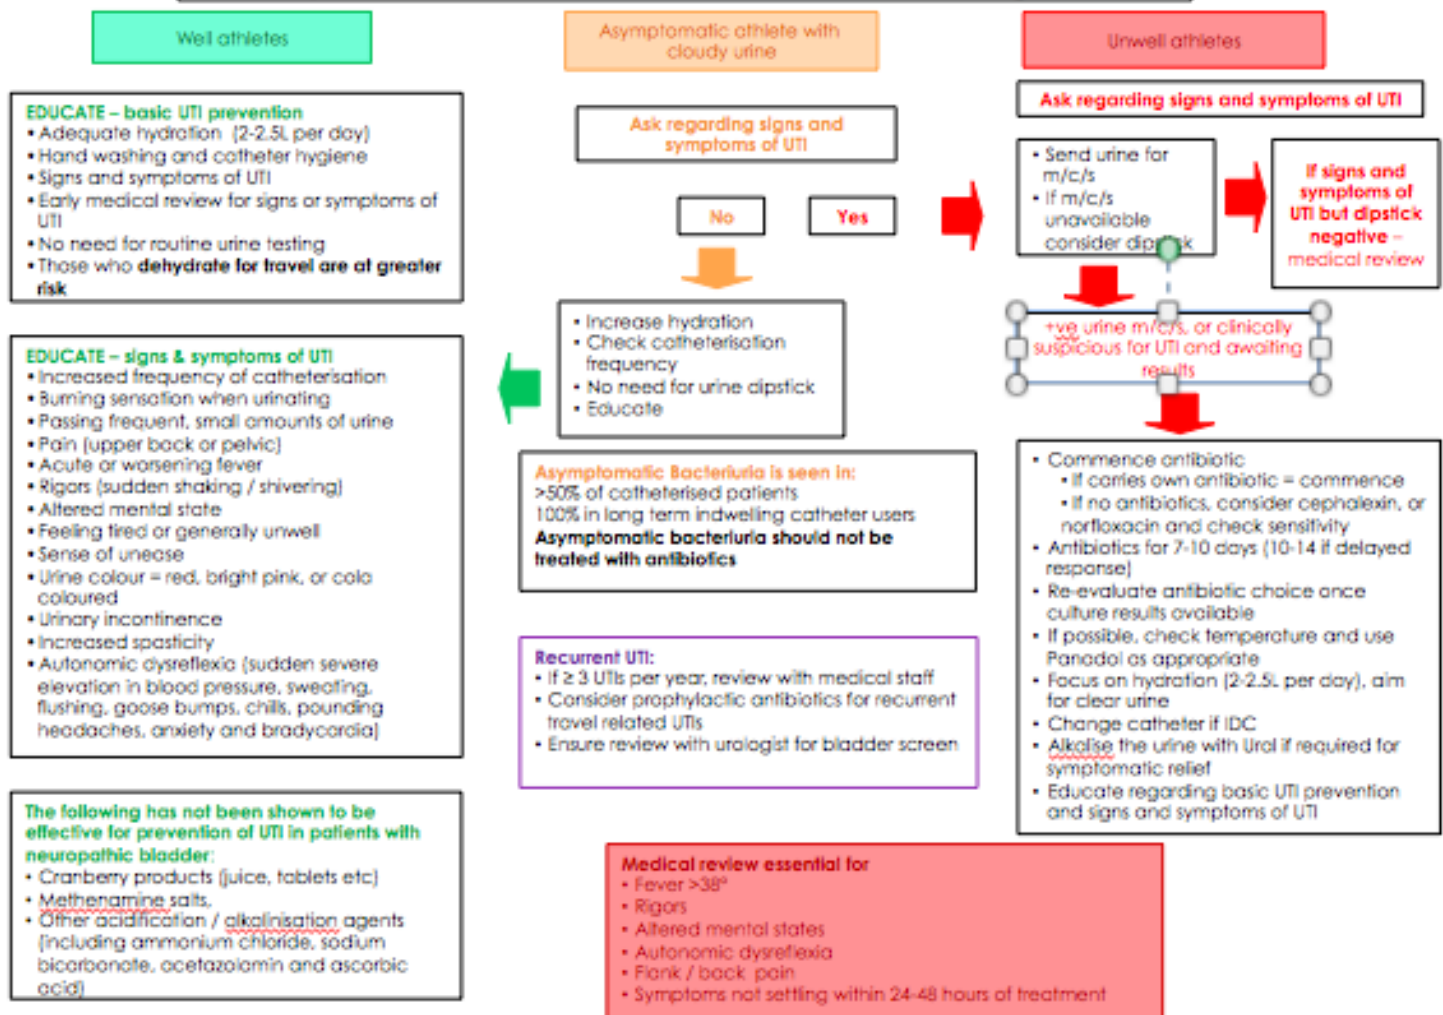

Supplement: bjsports-2014-094527supp_AppendixA.pdf [file bjsports-2014-094527supp_AppendixA.pdf]
