# Supplementary material for: Australian Institute of Sport and the Australian Paralympic Committee position statement: urinary tract infection in spinal cord injured athletes
Source: HighWire-hosted journal article supplement (doi:10.1136/bjsports-2014-094527), 2015-04-13

## Appendix B: Urinary Tract Infection Prevention and Management Patient Handout

### Patient Handout: Urinary Tract Infection Prevention and Management

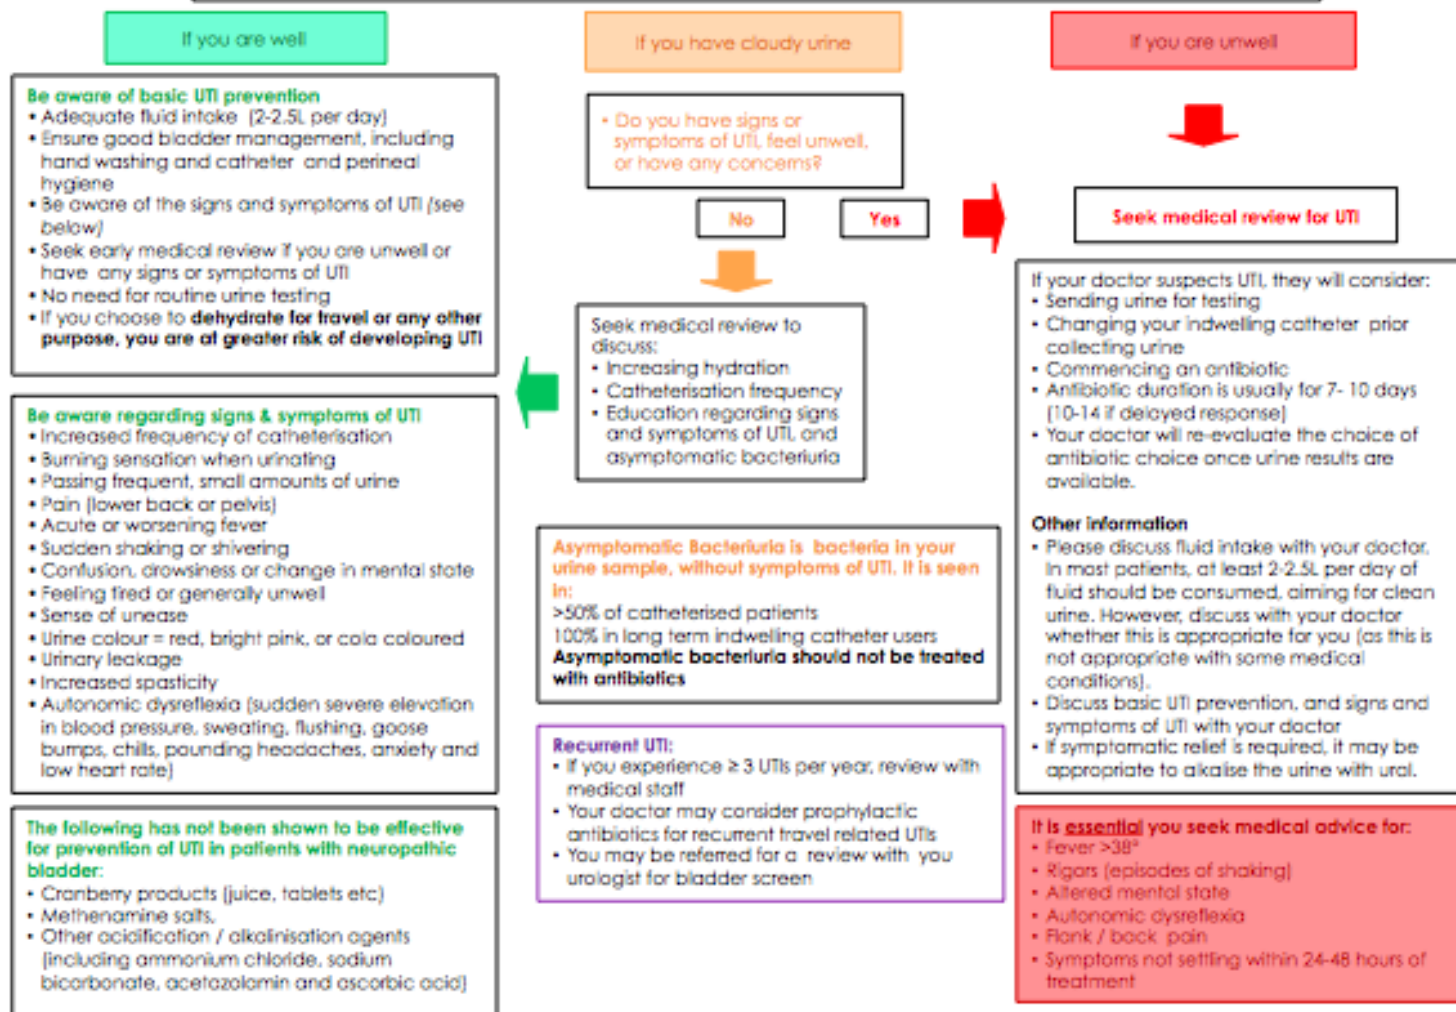

Supplement: bjsports-2014-094527supp_AppendixB.pdf [file bjsports-2014-094527supp_AppendixB.pdf]
